# Supplementary material for: Environmental Heterogeneity and Salinity Gradient Impacted the Alpha and Beta Diversities of Diatom Assemblages in a Coastal Delta Wetland
Source: MDPI journal article supplement (doi:10.3390/w15193414), 2023-09-28
Supplement: s1 [file s1]

## Supplementary data

Environmental heterogeneity and salinity gradient impacted the alpha and beta diversities of diatom assemblages in a coastal delta wetland by Dalkıran & Zünbülğil-Ünsal

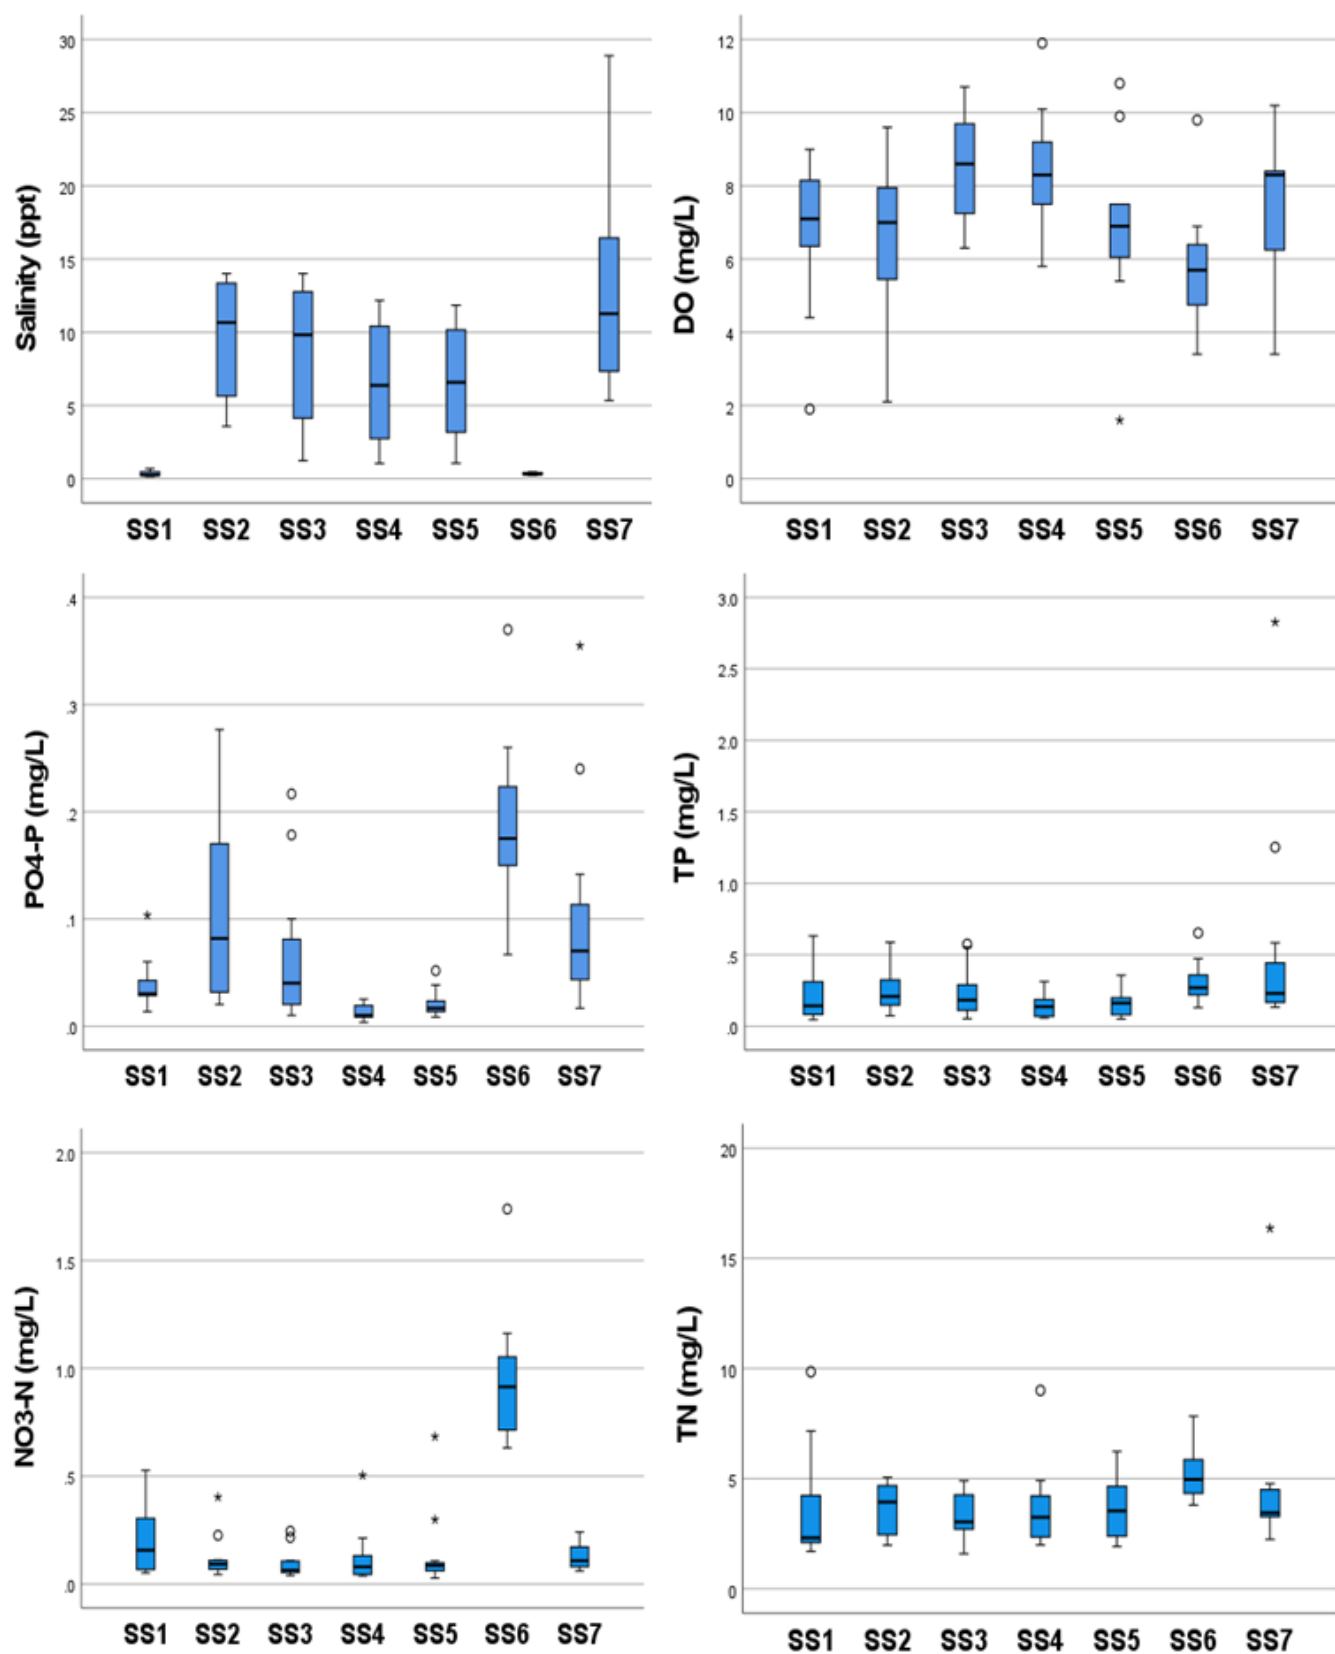

**Figure S1.** The box-plot graphics of some measured physicochemical variables.

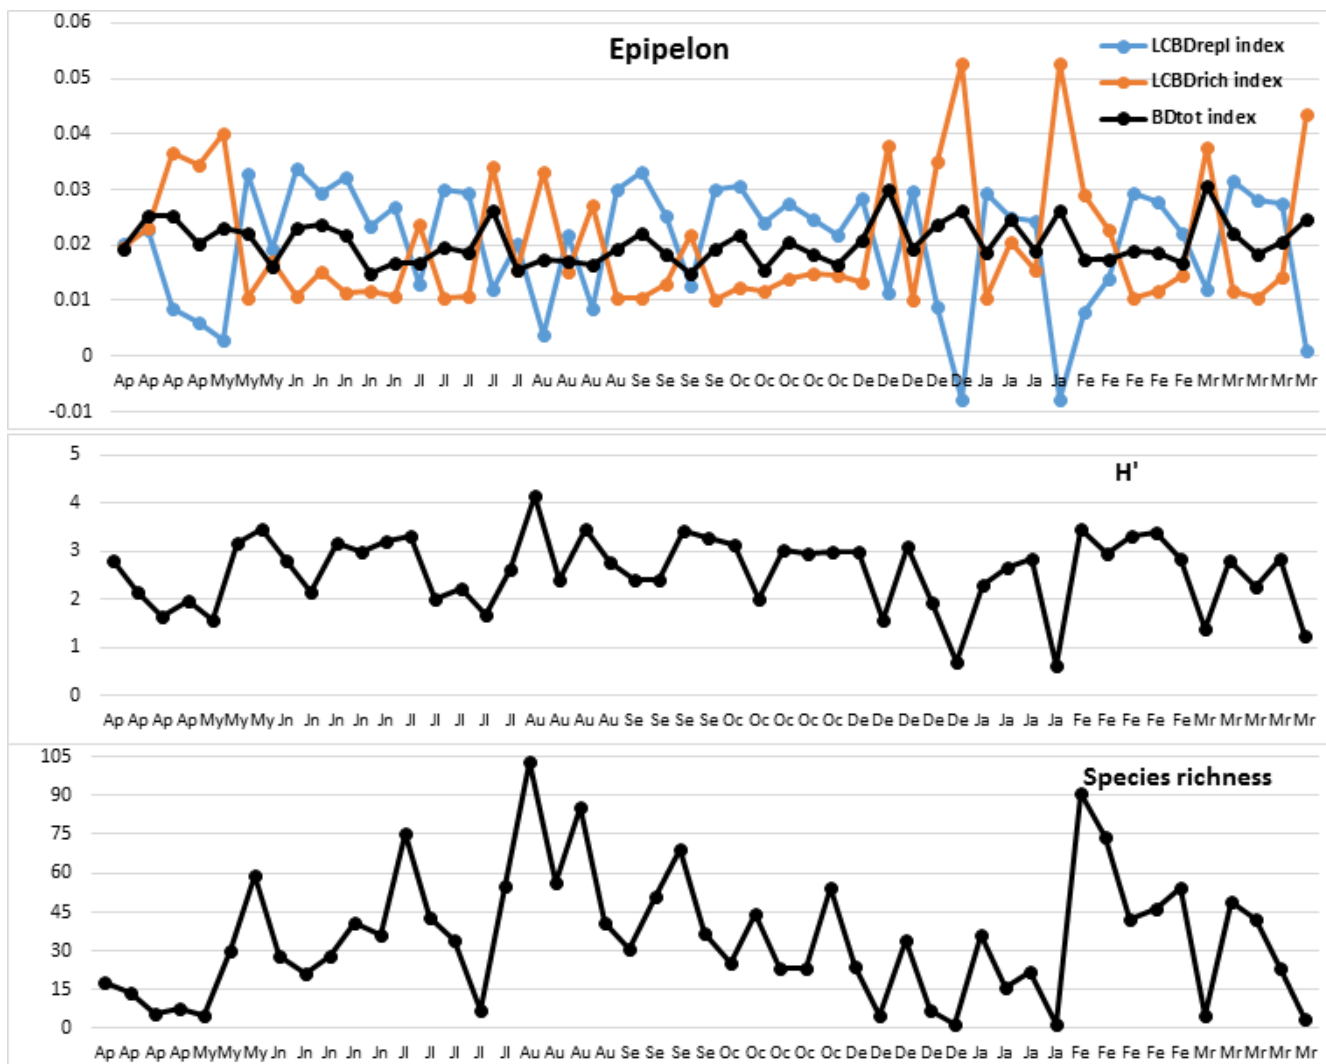

**Figure S2.** The spatial and temporal variations of species richness, alpha and beta diversity indices of epipelon samples. Alpha diversity index was estimated as relative abundance, and beta diversity indices were estimated based on presence-absence data (n: 49).

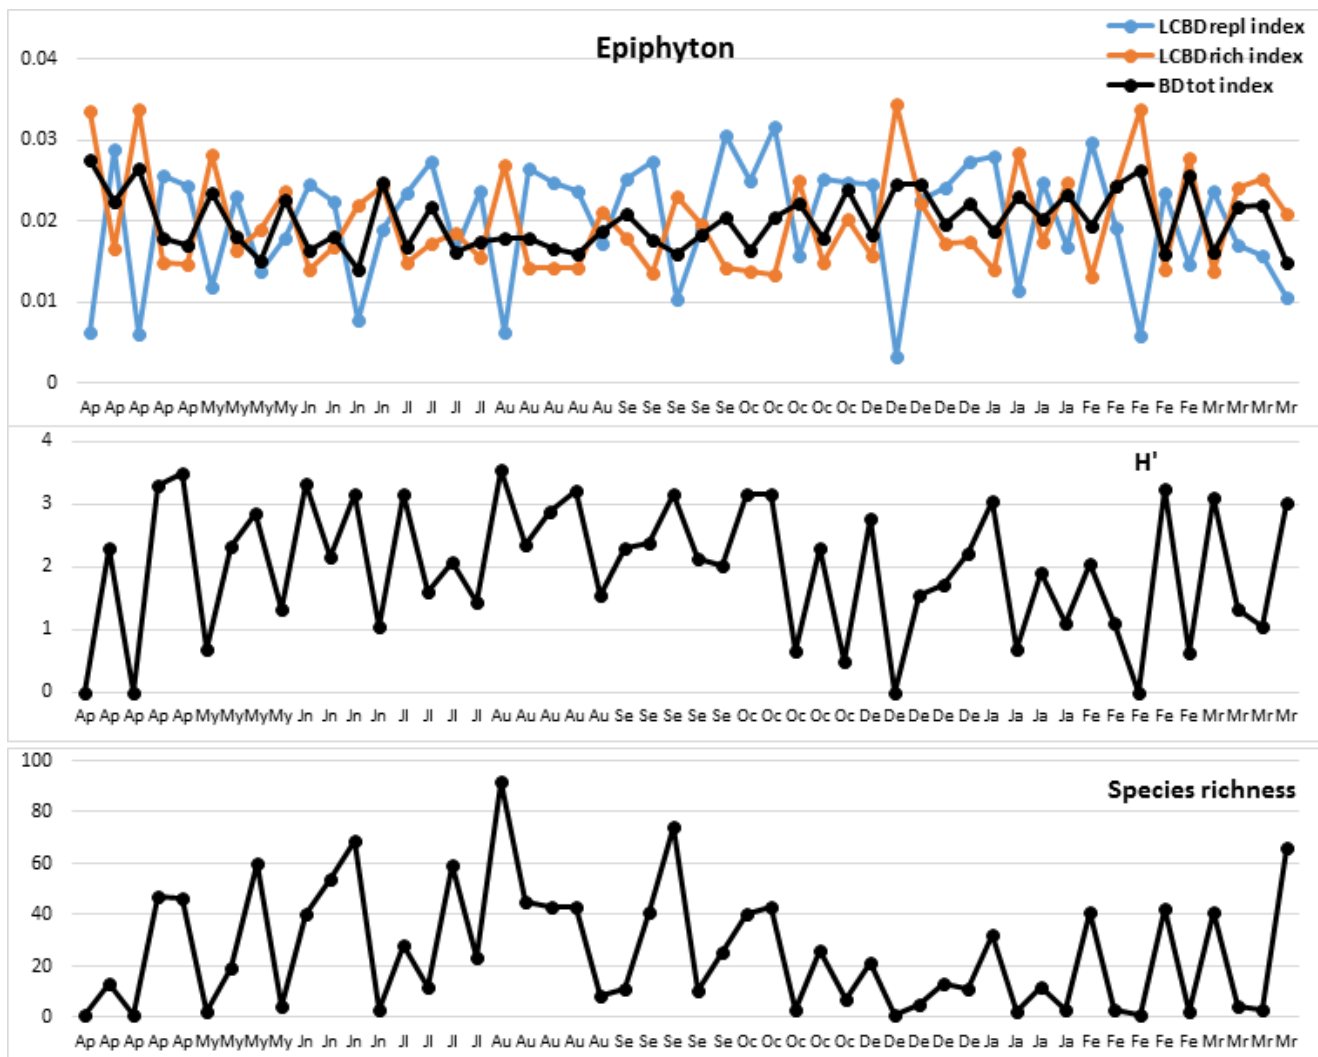

**Figure S3.** The spatial and temporal variations of species richness, alpha and beta diversity indices of epiphyton samples. Alpha diversity index was estimated as relative abundance, and beta diversity indices were estimated based on presence-absence data (n: 50).

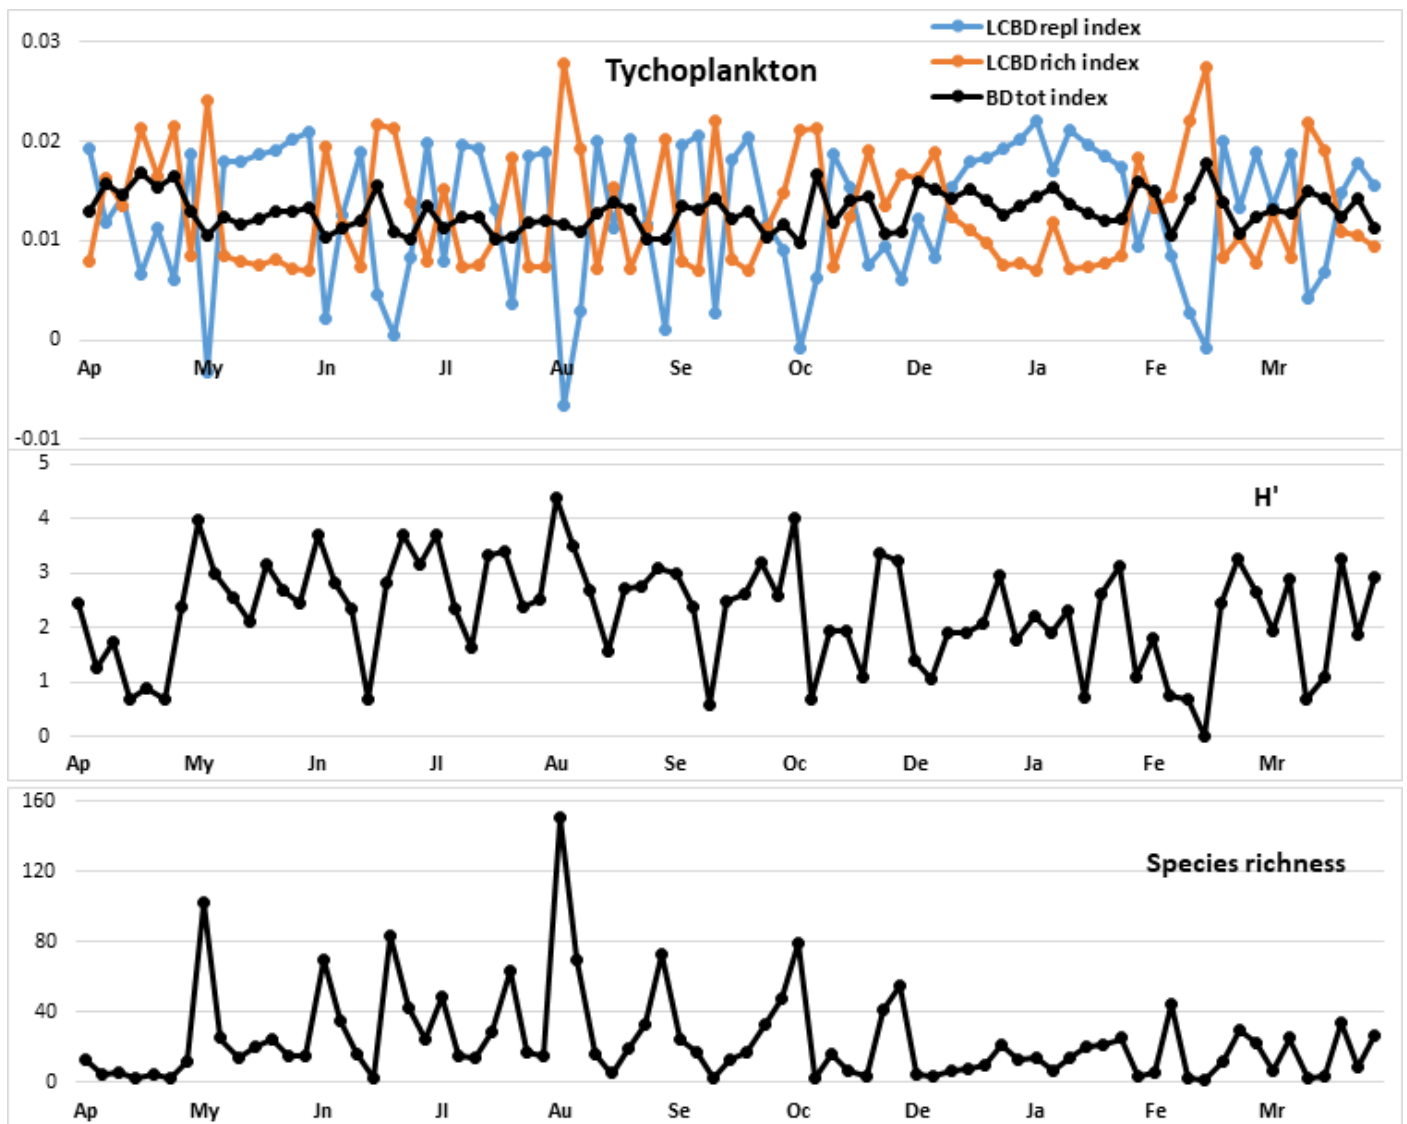

**Figure S4.** The spatial and temporal variations of species richness, alpha and beta diversity indices of tychoplankton. Alpha diversity index was estimated as relative abundance, and beta diversity indices were estimated based on presence-absence data (n: 77).

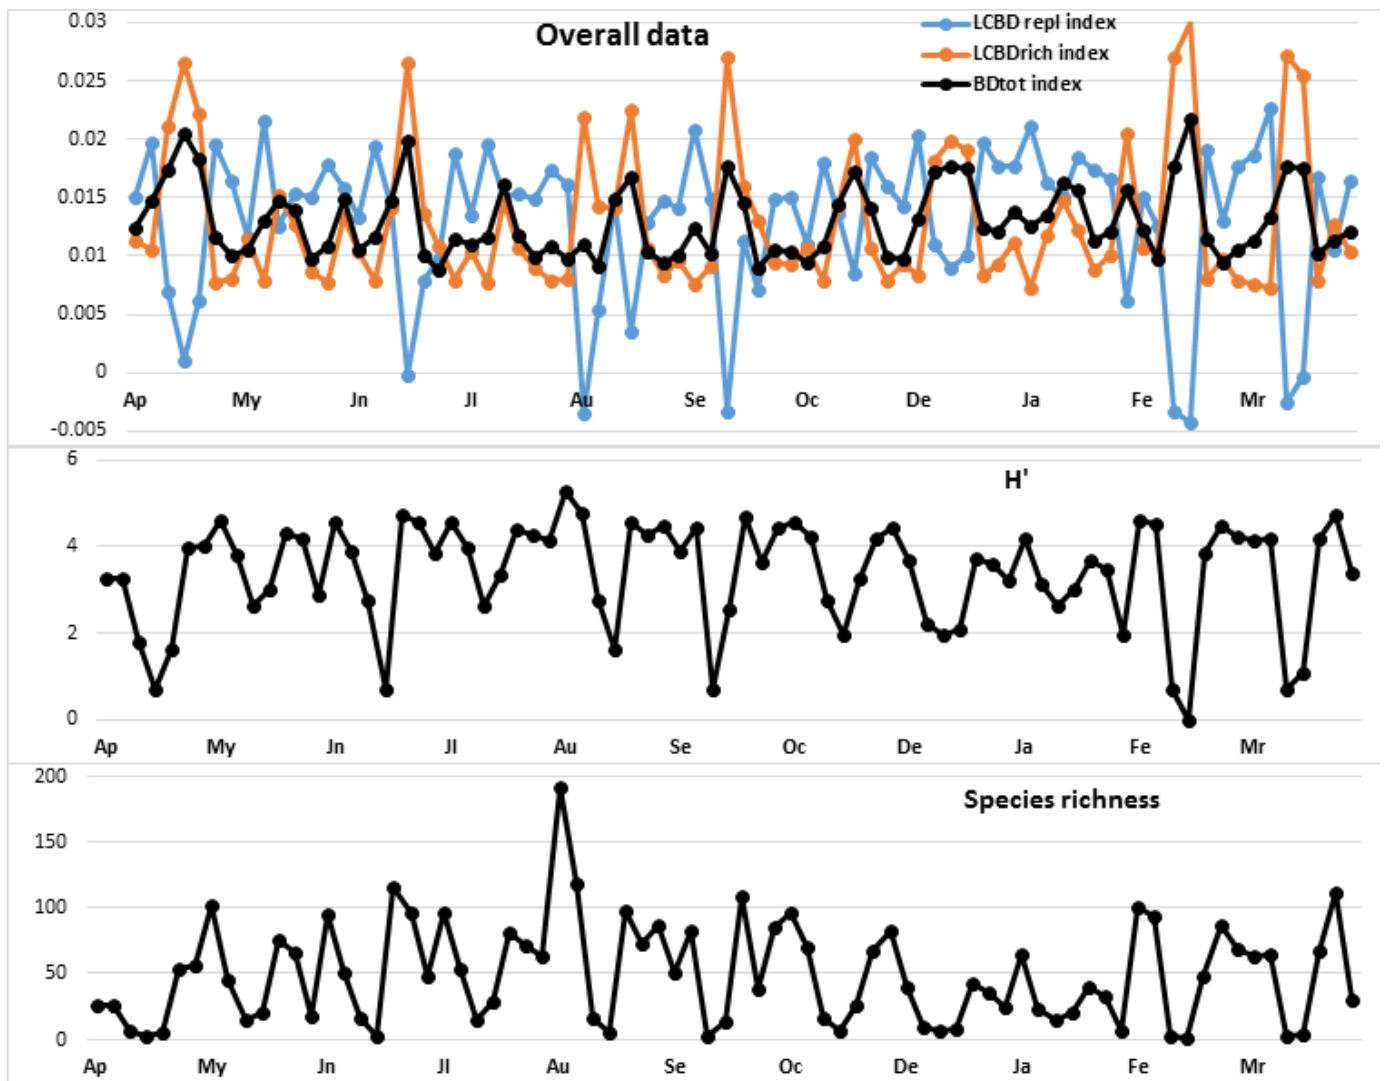

**Figure S5.** The spatial and temporal variations of species richness, alpha and beta diversity indices of overall combined data. All diversity indices were estimated based on presence-absence data (n: 77).

**Table S1.** Species richness and diversity results according to study sites based overall combined data. All diversity indices were estimated according to presence absence data.

| Species Richness   |                   |                   |                    | alpha<br>diversity | beta diversity       |                      |                     |                   |
|--------------------|-------------------|-------------------|--------------------|--------------------|----------------------|----------------------|---------------------|-------------------|
|                    | n <sub>samp</sub> | n <sub>taxa</sub> | mean (min-<br>max) | H'±Jackknife<br>SE | LCBD <sub>repl</sub> | LCBD <sub>rich</sub> | LCBD <sub>tot</sub> | BD <sub>tot</sub> |
| study sites        |                   |                   |                    |                    |                      |                      |                     |                   |
| SS1                | 11                | 266               | 84.09 (26-192)     | 5.280±0.162        | 0.165                | 0.181                | 0.346               | 0.508             |
| SS2                | 11                | 203               | 57.73 (9-118)      | 5.056±0.088        | 0.176                | 0.213                | 0.388               | 0.616             |
| SS3                | 11                | 58                | 9.91 (2-16)        | 3.148±0.339        | 0.214                | 0.202                | 0.416               | 0.526             |
| SS4                | 11                | 68                | 10.00 (1-29)       | 2.16±1.289         | 0.201                | 0.271                | 0.472               | 0.884             |
| SS5                | 11                | 227               | 64.18 (5-115)      | 5.147±0.083        | 0.165                | 0.219                | 0.384               | 0.607             |
| SS6                | 11                | 210               | 66.36 (32 - 112)   | 5.046±0.095        | 0.195                | 0.148                | 0.343               | 0.511             |
| SS7                | 11                | 192               | 51.91 (7-87)       | 4.987±0.085        | 0.174                | 0.219                | 0.393               | 0.619             |
| All samp. indices: | 77                | 357               | 49.17 (1-192)      | 5.372±0.051        | 0.159                | 0.268                | 0.426               | 0.722             |

**Table S2.** Results of spearman rank correlation analysis between some physicochemical variables and diversity indices based overall combined data. All diversity indices were estimated according to presence absence data (\*\*Correlation is significant at the 0.01 level, 2-tailed)

|                    | BDtot index | LCBDrep index | LCBDrich index | H' index | Sp. Rich. |
|--------------------|-------------|---------------|----------------|----------|-----------|
| BDtot index        |             |               | 0.610**        | -0.902** |           |
| LCBDrep index      |             | 1             |                |          |           |
| LCBDrich index     | 0.610**     | -0.836**      | 1              | -0.561** | -0.561**  |
| H' index           | -0.902**    |               | -0.561**       | 1        | -0.902**  |
| Sp. Rich.          | -0.902**    |               | -0.561**       | 1**      | 1         |
| DO                 | 0.400**     |               | 0.326**        | -0.421** | -0.421**  |
| T                  | -0.380**    |               |                | 0.329**  | 0.329**   |
| PO <sub>4</sub> P  | -0.438**    | 0.305**       | -0.248**       | 0.363**  | 0.363**   |
| TP                 | -0.309**    |               |                | 0.258**  | 0.258**   |
| NO <sub>3</sub> -N |             | 0.322**       | -0.320**       |          |           |
| TN                 | -0.372**    |               |                | 0.328**  | 0.328**   |
